# Supplementary material for: Anionic polyelectrolytes in titanosilicate molecular sieve synthesis towards simultaneously accomplishing low production cost and high catalytic activity
Source: Royal Society of Chemistry journal article supplement (doi:10.1039/c8ra02621a), 2018-01-01
Supplement: c8ra02621a1.pdf [file c8ra02621a1.pdf]

Supporting information for:

**Anionic polyelectrolytes in titanasilicate molecular sieve synthesis towards simultaneously accomplishing low production cost and high catalytic activity**

Kairui Fu,<sup>a</sup> Jingui Wang,<sup>\*a</sup> Yichen Wang,<sup>a</sup> Yuanchao Shao,<sup>a</sup> Jiaqi Zhu,<sup>a</sup> and Tianduo Li<sup>\*a</sup>

<sup>a</sup> Shandong Provincial Key Laboratory of Fine Chemicals, School of Chemistry and Pharmaceutical Engineering, Qilu University of Technology (Shandong Academy of Sciences), Jinan 250353 P.R. China.

E-mail: JGWang@qlu.edu.cn; ylpt6296@vip.163.com

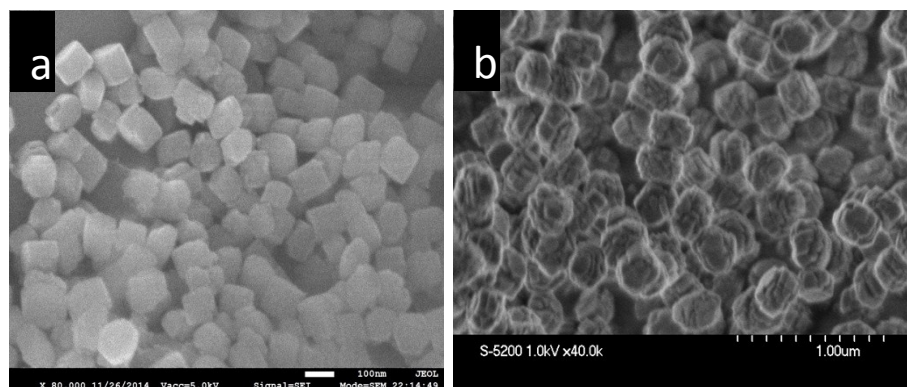

**Fig. S1** SEM images of (a) TS-1-0.45-0, (b) commercial TS-1.
